# Supplementary material for: Ultrasound-Assisted Extraction of Anthocyanins from Malus ‘Royalty’ Fruits: Optimization, Separation, and Antitumor Activity
Source: MDPI journal article supplement (doi:10.3390/molecules27134299), 2022-07-04
Supplement: s1 [file s1]

## Article

# Ultrasound-Assisted Extraction of Anthocyanins from *Malus* ‘Royalty’ Fruits: Optimization, Separation, and Antitumor Activity

Yixin Liu <sup>1,†</sup>, Yuheng Zhao <sup>1,†</sup>, Yue Zhuo <sup>1</sup>, Yuwen Li <sup>2</sup>, Jiaxin Meng <sup>1</sup>, Yilin Wang <sup>1</sup> and Houhua Li <sup>1,\*</sup>

<sup>1</sup> College of Landscape Architecture and Art, Northwest A & F University, Yangling 712100, China; lyx13426325830@126.com (Y.L.); wn15553803032@163.com (Yuheng Zhao); zhuoyuegongzuo@163.com (Yue Zhuo); mengjiaxin26@163.com (J.M.); wangyilin97417@163.com (Y.W.)

<sup>2</sup> Shanghai United International School, Gubei Secondary Campus, Shanghai 201103, China; ellaliyuwen@icloud.com

\* Correspondence: lihohua@nwfau.edu.cn

† Yixin Liu and Yuheng Zhao contributed equally to this work.

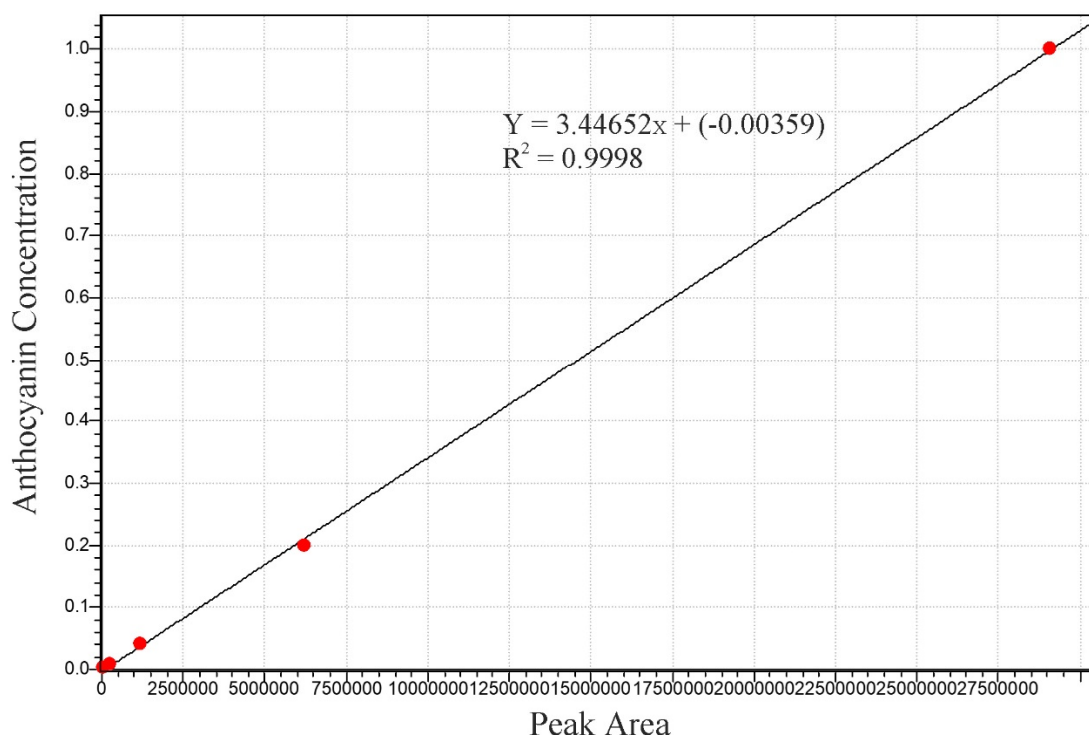

**Figure S1.** Calibration curve for standard Cyanidin-3-galactoside.

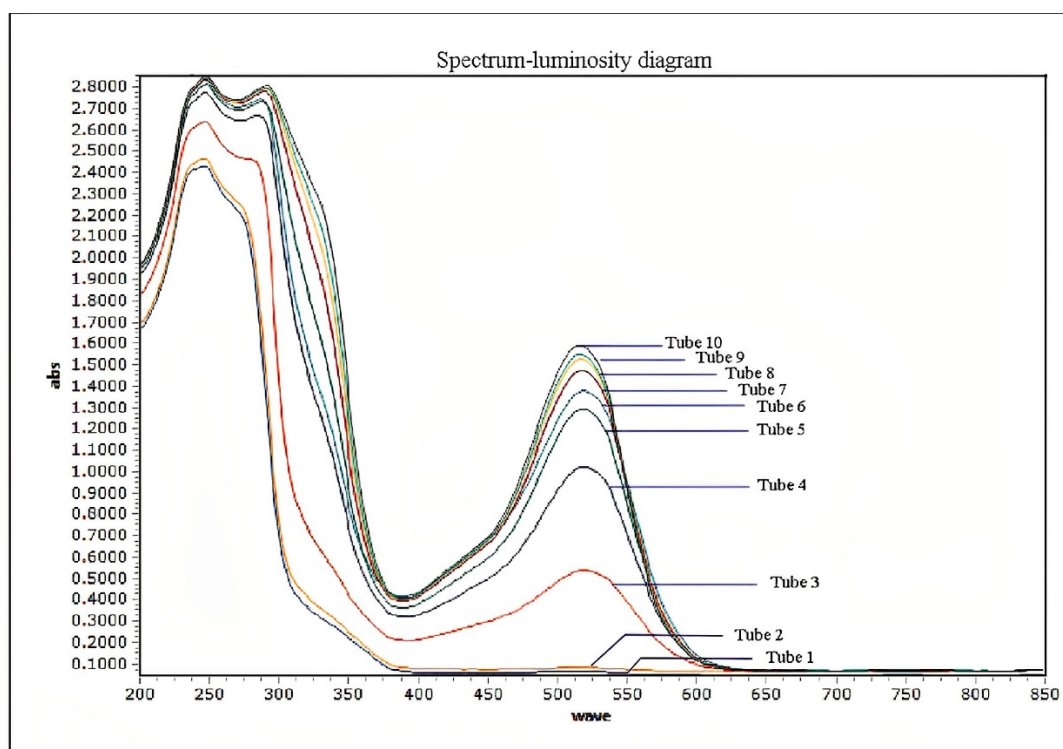

Figure S2. Photometric spectrogram of the eluent during the dynamic elution of anthocyanins.

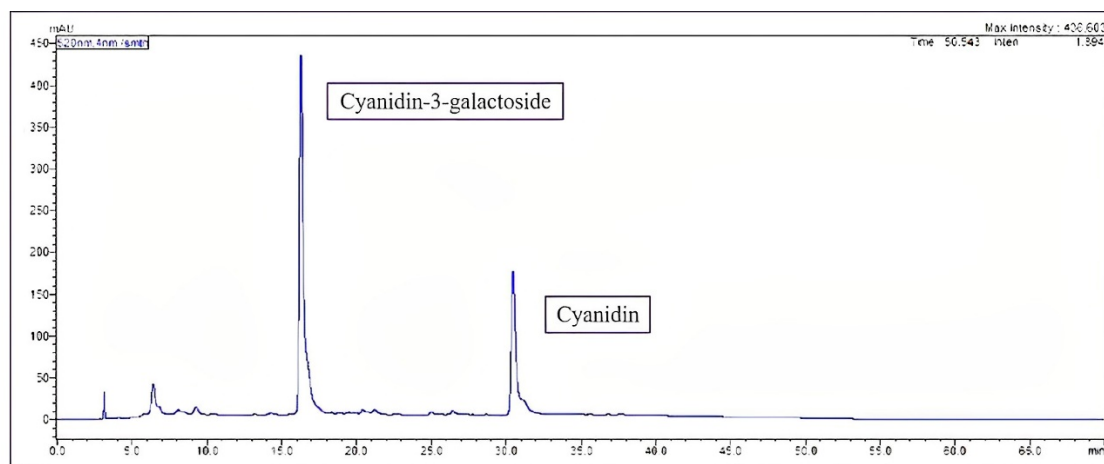

Figure S3. HPLC-DAD chromatogram at 525 nm of the purified anthocyanin.
